# Supplementary material
Source: HighWire-hosted journal article supplement (http://dmd.aspetjournals.org/highwire/filestream/77078/field_highwire_adjunct_files/0/DMD380R2_Supplemental_File.pdf)
Supplement: DMD380R2_Supplemental_File.pdf [file DMD380R2_Supplemental_File.pdf]

## **Supplemental file**

Article title:

MicroRNAs in apple-derived nanoparticles modulate intestinal expression of OATP2B1/*SLCO2B1* in Caco-2 cells

Authors:

Hisakazu Komori, Daichi Fujita, Yuma Shirasaki, Qiunan Zhu, Yui Iwamoto, Takeo Nakanishi, Miki Nakajima, Ikumi Tamai

Journal title:

Drug Metabolism and Disposition

Manuscript number:

#DMD-AR-2021-000380

Supplemental Table 1 Primer sequences for plasmid construction

| Primer Name                             | Sequence (5' to 3')           |
|-----------------------------------------|-------------------------------|
| <i>SLCO2B1</i> -3'UTR _Fwd.             | TTTTCTAGAGCTGTCTTGGGGCCCCACCT |
| <i>SLCO2B1</i> -3'UTR _Rev.             | TTTTCTAGAAAAGATTGGAAAAGATGTAA |
| <i>SLCO2B1</i> -3'UTR(+2343–+2562)_Fwd. | CCGTCTAGAGCCTTTGCTTGCTAGTCTGA |
| <i>SLCO2B1</i> -3'UTR(+2343–+2562)_Rev. | TTTTCTAGAACCTGGGCTGGGGCCCAGCA |
| <i>SLCO2B1</i> -3'UTR(+2715–+2913)_Fwd. | ATATCTAGAGTCCCTTTGGCGCCCCCTGG |
| <i>SLCO2B1</i> -3'UTR(+2715–+2913)_Rev. | ATATCTAGACACCCTCAACCGTGGCTCCC |

Bold letters indicate complementary sequence to template.

Supplemental Table 2 Primer sequences for plasmid mutagenesis

| Primer Name                                     | Sequence (5' to 3')                      |
|-------------------------------------------------|------------------------------------------|
| <i>SLCO2B1</i> -3'UTR Mut1a_Fwd.                | CTGG <b>C</b> CGGTCCGTTTCCTGGGTGGAAAGAA  |
| <i>SLCO2B1</i> -3'UTR Mut1a_Rev.                | GAAAC <b>G</b> GACCGGCCAGGACAGCTGGCTGGC  |
| <i>SLCO2B1</i> -3'UTR Mut1b_Fwd.                | TAGTG <b>C</b> CGGTCCGTGCCCTCCATGCTGGGCC |
| <i>SLCO2B1</i> -3'UTR Mut1b_Rev.                | GGC <b>A</b> CGGACCGGCACTATGGCTCACTTTGC  |
| <i>SLCO2B1</i> -3'UTR Mut2_Fwd.                 | GCCT <b>A</b> GTTCCTCCCCTGTGTGGGGGCCCCAG |
| <i>SLCO2B1</i> -3'UTR Mut2_Rev.                 | CAG <b>G</b> GGAGAACTAGGCCCTGCCAAGTCTGG  |
| <i>SLCO2B1</i> -3'UTR(+2715–+2913)<br>Mut2_Fwd. | GCCT <b>A</b> GTTCCTCCCCTGTGTGGGGGCCCCAG |
| <i>SLCO2B1</i> -3'UTR(+2715–+2913)<br>Mut2_Rev. | CAG <b>G</b> GGAGAACTAGGCCCTGCCAAGTCTGG  |

Bold letters indicate mutational sequence for candidate miRNA.

Supplemental Table 3 Primer sequences for miRNA detection

| Primer Name     | Sequence (5' to 3')    |
|-----------------|------------------------|
| mdm-miR-160a-e  | TGCCTGGCTCCCTGTATGCCA  |
| mdm-miR-390a-f  | AAGCTCAGGAGGGATAGCGCC  |
| mdm-miR-391     | TACGCAGGAGAGATGACGCCG  |
| mdm-miR-395a-i  | CTGAAGTGTTTGGGGGAACTC  |
| mdm-miR-477b    | ACTCTCCCTCAAGGGCTTCGAC |
| mdm-miR-7121a-c | TCCTCTTGGTGATCGCCCTGT  |
| mdm-miR-7121d-h | TCCTCTTGGTGATCGCCCTGC  |
| hsa-miR-1       | TGGAATGTAAAGAAGTATGTAT |
